# Supplementary material for: Increased prevalence of clonal hematopoiesis of indeterminate potential amongst people living with HIV
Source: PubMed Central journal article supplement (PMC8755790; doi:10.1038/s41598-021-04308-2), 2022-01-12
Supplement: 41598_2021_4308_MOESM1_ESM.pdf [file 41598_2021_4308_MOESM1_ESM.pdf]

Supplementary materials to a paper “Increased Prevalence of Clonal Hematopoiesis of Indeterminate Potential Amongst People Living with HIV”

Table S1. List of CHIP carriers from the SHCS cohort.

| Sample | CHIP Gene               | CHIP Variant                           | VAF                                                           | Used In Matched SubSet | Smoke. EverSmoke | Disease. CVD | Disease. Diabetes |
|--------|-------------------------|----------------------------------------|---------------------------------------------------------------|------------------------|------------------|--------------|-------------------|
| 1      | TET2                    | R1516X                                 | 0.129411764705882                                             | 1                      | 0                | 1            | 0                 |
| 2      | ASXL1                   | G645Vfs*58                             | 0.032786885245902                                             | 0                      | 1                | 0            | 1                 |
| 3      | ASXL1                   | E635Rfs*15                             | 0.069364161849711                                             | 1                      | 0                | 1            | 0                 |
| 4      | ASXL1                   | G645Vfs*58                             | 0.039473684210526                                             | 1                      | 1                | 0            | 0                 |
| 5      | ASXL1                   | G645Vfs*58                             | 0.041420118343195                                             | 1                      | 0                | 1            | 0                 |
| 6      | ASXL1                   | G645Vfs*58                             | 0.026490066225166                                             | 0                      | 0                | 0            | 0                 |
| 7      | ASXL1                   | G645Vfs*58                             | 0.028571428571429                                             | 0                      | 1                | 1            | 1                 |
| 8      | ASXL1                   | G645Vfs*58                             | 0.068571428571429                                             | 0                      | 0                | 0            | 0                 |
| 9      | ASXL1                   | G645Vfs*58                             | 0.05421686746988                                              | 0                      | 1                | 0            | 1                 |
| 10     | TET2                    | Q764Pfs*5                              | 0.056179775280899                                             | 1                      | 1                | 0            | 0                 |
| 11     | ASXL1                   | G645Vfs*58                             | 0.040201005025126                                             | 0                      | 1                | 0            | 0                 |
| 12     | DNMT3A                  | N612Lfs*34                             | 0.04                                                          | 0                      | 0                | 0            | 0                 |
| 13     | DNMT3A                  | I495Sfs*156                            | 0.115384615384615                                             | 1                      | 1                | 0            | 0                 |
| 14     | DNMT3A                  | F909Lfs*13                             | 0.029761904761905                                             | 1                      | 0                | 0            | 1                 |
| 15     | DNMT3A                  | W795X                                  | 0.456521739130435                                             | 0                      | 1                | 0            | 0                 |
| 16     | ASXL1,<br>TET2,<br>TET2 | E1400Dfs*22,<br>S1290X,<br>L1646Rfs*49 | 0.117647058823529,<br>0.294117647058824,<br>0.364285714285714 | 1                      | 1                | 0            | 0                 |
| 17     | TET2                    | G429X                                  | 0.02247191011236                                              | 0                      | 0                | 0            | 0                 |
| 18     | BCOR                    | E902X                                  | 0.051724137931035                                             | 0                      | 0                | 0            | 0                 |
| 19     | ASXL1                   | Y1441Mfs*9                             | 0.03125                                                       | 1                      | 1                | 0            | 0                 |
| 20     | DNMT3A                  | W795Cfs*13                             | 0.051724137931035                                             | 1                      | 1                | 0            | 0                 |
| 21     | TET2                    | G563X                                  | 0.03125                                                       | 1                      | 0                | 0            | 0                 |
| 22     | TET2                    | R550X                                  | 0.028301886792453                                             | 1                      | 1                | 0            | 0                 |
| 23     | ASXL1, TET2             | G645Vfs*58,<br>S354X                   | 0.0381679389312977,<br>0.2                                    | 0                      | 1                | 0            | 0                 |
| 24     | ASXL1                   | G645Vfs*58                             | 0.03448275862069                                              | 0                      | 1                | 0            | 0                 |

Table S2. List of CHIP carriers from the matched ARIC cohort.

| Sample | CHIP Gene | CHIP Variant       | VAF   | Used In Matched Subset | Smoke. EverSmoke | Disease. CVD | Disease. Diabetes |
|--------|-----------|--------------------|-------|------------------------|------------------|--------------|-------------------|
| 1      | DNMT3A    | W795L              | 0.104 | 1                      | 1                | 0            | 0                 |
| 2      | DNMT3A    | R749C              | 0.078 | 1                      | 0                | 0            | 0                 |
| 3      | TET2      | I274fs             | 0.064 | 1                      | 0                | 0            | 0                 |
| 4      | DNMT3A    | R882H              | 0.254 | 1                      | 1                | 0            | 0                 |
| 5      | ASXL1     | G642fs             | 0.207 | 1                      | 0                | 0            | 0                 |
| 6      | DNMT3A    | W860X              | 0.098 | 1                      | 0                | 0            | 0                 |
| 7      | ASXL1     | Q529X              | 0.153 | 1                      | 1                | 0            | 0                 |
| 8      | DNMT3A    | W860R              | 0.099 | 1                      | 1                | 0            | 0                 |
| 9      | DNMT3A    | R882H              | 0.178 | 1                      | 1                | 0            | 0                 |
| 10     | DNMT3A    | L653F              | 0.258 | 1                      | 1                | 0            | 0                 |
| 11     | DNMT3A    | exon12:c.1481-1G>A | 0.123 | 1                      | 0                | 0            | 0                 |
| 12     | GNB1      | K57E               | 0.331 | 1                      | 0                | 0            | 0                 |
| 13     | DNMT3A    | exon13:c.1717+1G>A | 0.121 | 1                      | 1                | 0            | 0                 |
| 14     | DNMT3A    | I705T              | 0.051 | 1                      | 1                | 0            | 0                 |
| 15     | DNMT3A    | R882H              | 0.08  | 1                      | 1                | 0            | 0                 |
| 16     | DNMT3A    | W440X              | 0.082 | 1                      | 1                | 0            | 0                 |
| 17     | TET2      | S835X              | 0.065 | 1                      | 1                | 1            | 1                 |
| 18     | TP53      | C238Y              | 0.086 | 1                      | 1                | 0            | 0                 |
| 19     | ASXL1     | Y974_C975delinsX   | 0.143 | 1                      | 1                | 0            | 0                 |
| 20     | ASXL1     | K1303X             | 0.145 | 1                      | 0                | 0            | 0                 |
| 21     | DNMT3A    | exon13:c.1717+1G>A | 0.097 | 1                      | 0                | 0            | 0                 |
| 22     | TET2      | S75fs              | 0.1   | 1                      | 1                | 0            | 0                 |
| 23     | TET2      | Q803X              | 0.064 | 1                      | 0                | 0            | 0                 |
| 24     | DNMT3A    | R635Q              | 0.352 | 1                      | 0                | 0            | 0                 |
| 25     | ASXL1     | R693X              | 0.177 | 1                      | 1                | 0            | 0                 |
| 26     | BCOR      | L1284fs            | 0.058 | 1                      | 1                | 0            | 0                 |
| 27     | TET2      | L1032fs            | 0.092 | 1                      | 1                | 0            | 0                 |
| 28     | SF3B1     | K700E              | 0.057 | 1                      | 0                | 0            | 0                 |

Table S3. List of 74 CHIP genes and variants, used to refer to the CHIP carriers.

| Gene   | ReportedMut                                                                                                                                                                                                                                                                                                                                                                                                                                                                                                                                                                                                                                                                                                                                                                                                                                                                                                                                                                                                                                                                                                                                                                                                                                                                                                                                                                                                                                                                                                                                                                                                                                                                                                                               | Accession    |
|--------|-------------------------------------------------------------------------------------------------------------------------------------------------------------------------------------------------------------------------------------------------------------------------------------------------------------------------------------------------------------------------------------------------------------------------------------------------------------------------------------------------------------------------------------------------------------------------------------------------------------------------------------------------------------------------------------------------------------------------------------------------------------------------------------------------------------------------------------------------------------------------------------------------------------------------------------------------------------------------------------------------------------------------------------------------------------------------------------------------------------------------------------------------------------------------------------------------------------------------------------------------------------------------------------------------------------------------------------------------------------------------------------------------------------------------------------------------------------------------------------------------------------------------------------------------------------------------------------------------------------------------------------------------------------------------------------------------------------------------------------------|--------------|
| ASXL1  | Frameshift/nonsense/splice-site in exon 11-12                                                                                                                                                                                                                                                                                                                                                                                                                                                                                                                                                                                                                                                                                                                                                                                                                                                                                                                                                                                                                                                                                                                                                                                                                                                                                                                                                                                                                                                                                                                                                                                                                                                                                             | NM_015338    |
| ASXL2  | Frameshift/nonsense/splice-site in exon 11-12                                                                                                                                                                                                                                                                                                                                                                                                                                                                                                                                                                                                                                                                                                                                                                                                                                                                                                                                                                                                                                                                                                                                                                                                                                                                                                                                                                                                                                                                                                                                                                                                                                                                                             | NM_018263    |
| BCOR   | Frameshift/nonsense/splice-site                                                                                                                                                                                                                                                                                                                                                                                                                                                                                                                                                                                                                                                                                                                                                                                                                                                                                                                                                                                                                                                                                                                                                                                                                                                                                                                                                                                                                                                                                                                                                                                                                                                                                                           | NM_001123385 |
| BCORL1 | Frameshift/nonsense/splice-site                                                                                                                                                                                                                                                                                                                                                                                                                                                                                                                                                                                                                                                                                                                                                                                                                                                                                                                                                                                                                                                                                                                                                                                                                                                                                                                                                                                                                                                                                                                                                                                                                                                                                                           | NM_021946    |
| BRAF   | G464E, G464V, G466E, G466V, G469R, G469E, G469A, G469V, V471F, V472S, L485W, N581S, I582M, I592M, I592V, D594N, D594G, D594V, D594E, F595L, F595S, G596R, L597V, L597S, L597Q, L597R, A598V, V600M, V600L, V600K, V600R, V600E, V600A, V600G, V600D, K601E, K601N, R603*, W604R, W604G, S605G, S605F, S605N, G606E, G606A, G606V, H608R, H608L, G615R, S616P, S616F, L618S, L618W                                                                                                                                                                                                                                                                                                                                                                                                                                                                                                                                                                                                                                                                                                                                                                                                                                                                                                                                                                                                                                                                                                                                                                                                                                                                                                                                                         | NM_004333    |
| BRCC3  | Frameshift/nonsense/splice-site                                                                                                                                                                                                                                                                                                                                                                                                                                                                                                                                                                                                                                                                                                                                                                                                                                                                                                                                                                                                                                                                                                                                                                                                                                                                                                                                                                                                                                                                                                                                                                                                                                                                                                           | NM_024332    |
| CBL    | RING finger missense p.381-421                                                                                                                                                                                                                                                                                                                                                                                                                                                                                                                                                                                                                                                                                                                                                                                                                                                                                                                                                                                                                                                                                                                                                                                                                                                                                                                                                                                                                                                                                                                                                                                                                                                                                                            | NM_005188    |
| CBLB   | RING finger missense p.372-412                                                                                                                                                                                                                                                                                                                                                                                                                                                                                                                                                                                                                                                                                                                                                                                                                                                                                                                                                                                                                                                                                                                                                                                                                                                                                                                                                                                                                                                                                                                                                                                                                                                                                                            | NM_170662    |
| CEBPA  | Frameshift/nonsense/splice-site                                                                                                                                                                                                                                                                                                                                                                                                                                                                                                                                                                                                                                                                                                                                                                                                                                                                                                                                                                                                                                                                                                                                                                                                                                                                                                                                                                                                                                                                                                                                                                                                                                                                                                           | NM_004364    |
| CREBBP | Frameshift/nonsense/splice-site, D1435E, R1446L, R1446H, R1446C, Y1450C, P1476R, Y1482H, H1487Y, W1502C, Y1503D, Y1503H, Y1503F, S1680del                                                                                                                                                                                                                                                                                                                                                                                                                                                                                                                                                                                                                                                                                                                                                                                                                                                                                                                                                                                                                                                                                                                                                                                                                                                                                                                                                                                                                                                                                                                                                                                                 | NM_004380    |
| CSF1R  | L301F, L301S, Y969C, Y969N, Y969F, Y969H, Y969D                                                                                                                                                                                                                                                                                                                                                                                                                                                                                                                                                                                                                                                                                                                                                                                                                                                                                                                                                                                                                                                                                                                                                                                                                                                                                                                                                                                                                                                                                                                                                                                                                                                                                           | NM_005211    |
| CSF3R  | T615A, T618I, truncating c.741-791                                                                                                                                                                                                                                                                                                                                                                                                                                                                                                                                                                                                                                                                                                                                                                                                                                                                                                                                                                                                                                                                                                                                                                                                                                                                                                                                                                                                                                                                                                                                                                                                                                                                                                        | NM_000760    |
| CTCF   | Frameshift/nonsense, R377C, R377H, P378A, P378L                                                                                                                                                                                                                                                                                                                                                                                                                                                                                                                                                                                                                                                                                                                                                                                                                                                                                                                                                                                                                                                                                                                                                                                                                                                                                                                                                                                                                                                                                                                                                                                                                                                                                           | NM_006565    |
| CUX1   | Frameshift/nonsense                                                                                                                                                                                                                                                                                                                                                                                                                                                                                                                                                                                                                                                                                                                                                                                                                                                                                                                                                                                                                                                                                                                                                                                                                                                                                                                                                                                                                                                                                                                                                                                                                                                                                                                       | NM_181552    |
| DNMT3A | Frameshift/nonsense/splice-site, F290I, F290C, V296M, P307S, P307R, R326H, R326L, R326C, R326S, G332R, G332E, V339A, V339M, V339G, L344Q, L344P, R366P, R366H, R366G, A368T, A368V, R379H, R379C, I407T, I407N, I407S, F414L, F414S, F414C, A462V, K468R, C497G, C497Y, Q527H, Q527P, Y533C, S535F, C537G, C537R, G543A, G543S, G543C, L547H, L547P, L547F, M548I, M548K, G550R, W581R, W581G, W581C, R604Q, R604W, R635W, R635Q, S638F, G646V, G646E, L653W, L653F, I655N, V657A, V657M, R659H, Y660C, V665G, V665L, M674V, R676W, R676Q, G685R, G685E, G685A, D686Y, D686G, R688H, G699R, G699S, G699D, P700L, P700S, P700R, P700Q, P700T, P700A, D702N, D702Y, V704M, V704G, I705F, I705T, I705S, I705N, G707D, G707V, C710S, C710Y, S714C, V716D, V716F, V716I, N717S, N717I, P718L, R720H, R720G, K721R, K721T, Y724C, R729Q, R729W, R729G, F731C, F731L, F731Y, F731I, F732del, F732C, F732S, F732L, E733A, E733A, F734L, F734C, Y735C, Y735N, Y735S, R736H, R736C, R736P, L737H, L737V, L737F, L737R, A741V, P742P, P743R, P743L, R749C, R749L, R749H, R749G, F751L, F751C, F752del, F752C, F752L, F752I, F752V, W753G, W753C, W753R, L754P, L754R, L754H, F755S, F755I, F755L, M761I, M761V, G762C, V763I, S770L, S770W, S770P, R771Q, F772I, F772V, L773R, L773V, E774K, E774D, E774G, I780T, D781G, R792H, W795C, W795L, G796D, G796V, N797Y, N797H, N797S, P799S, P799R, P799H, R803S, R803W, P804L, P804S, K826R, S828N, K829R, T835M, N838D, K841Q, Q842E, P849L, D857N, W860R, E863D, F868S, G869S, G869V, M880V, S881R, S881I, R882H, R882P, R882C, R882G, A884P, A884V, Q886R, L889P, L889R, G890D, G890R, G890S, V895M, P896L, V897G, V897D, R899L, R899H, R899C, L901R, L901H, P904L, F909C, P904Q, A910P, C911R, C911Y | NM_022552    |
| EED    | Frameshift/nonsense/splice-site, L240Q, I363M                                                                                                                                                                                                                                                                                                                                                                                                                                                                                                                                                                                                                                                                                                                                                                                                                                                                                                                                                                                                                                                                                                                                                                                                                                                                                                                                                                                                                                                                                                                                                                                                                                                                                             | NM_003797    |
| EP300  | Frameshift/nonsense/splice_site, VF1148_1149del, D1399N, D1399Y, P1452L, Y1467N, Y1467H, Y1467C, R1627W, A1629V                                                                                                                                                                                                                                                                                                                                                                                                                                                                                                                                                                                                                                                                                                                                                                                                                                                                                                                                                                                                                                                                                                                                                                                                                                                                                                                                                                                                                                                                                                                                                                                                                           | NM_001429    |
| ETNK1  | N244S, N244T, N244K                                                                                                                                                                                                                                                                                                                                                                                                                                                                                                                                                                                                                                                                                                                                                                                                                                                                                                                                                                                                                                                                                                                                                                                                                                                                                                                                                                                                                                                                                                                                                                                                                                                                                                                       | NM_018638    |
| ETV6   | Frameshift/nonsense/splice-site                                                                                                                                                                                                                                                                                                                                                                                                                                                                                                                                                                                                                                                                                                                                                                                                                                                                                                                                                                                                                                                                                                                                                                                                                                                                                                                                                                                                                                                                                                                                                                                                                                                                                                           | NM_001987    |
| EZH2   | Frameshift/nonsense/splice-site, Q62R, N102S, F145S, F145C, F145Y, F145L, G159R, E164D, R202Q, K238E, E244K, R283Q, H292R, P488S, R497Q, R561H, T568I, K629E, Y641N, Y641H, Y641S, Y641C, Y641F, D659Y, D659G, V674M, A677G, A677V, R679C, R679H, R685C, R685H, A687V, N688I, N688K, H689Y, S690P, I708V, I708T, I708M, E720K, E740K                                                                                                                                                                                                                                                                                                                                                                                                                                                                                                                                                                                                                                                                                                                                                                                                                                                                                                                                                                                                                                                                                                                                                                                                                                                                                                                                                                                                      | NM_001203247 |
| FLT3   | V579A, V592A, V592I, F594L, FY590-591GD, D835Y, D835H, D835E, del835                                                                                                                                                                                                                                                                                                                                                                                                                                                                                                                                                                                                                                                                                                                                                                                                                                                                                                                                                                                                                                                                                                                                                                                                                                                                                                                                                                                                                                                                                                                                                                                                                                                                      | NM_004119    |
| GATA1  | Frameshift/nonsense/splice-site                                                                                                                                                                                                                                                                                                                                                                                                                                                                                                                                                                                                                                                                                                                                                                                                                                                                                                                                                                                                                                                                                                                                                                                                                                                                                                                                                                                                                                                                                                                                                                                                                                                                                                           | NM_002049    |
| GATA2  | Frameshift/nonsense/splice-site, R293Q, N317H, A318T, A318V, A318G, G320D, L321P, L321F, L321V, Q328P, R330Q, R361L, L359V, A372T, R384G, R384K                                                                                                                                                                                                                                                                                                                                                                                                                                                                                                                                                                                                                                                                                                                                                                                                                                                                                                                                                                                                                                                                                                                                                                                                                                                                                                                                                                                                                                                                                                                                                                                           | NM_001145661 |
| GATA3  | Frameshift/nonsense/splice-site ZNF domain, R276W, R276Q, N286T, L348V,                                                                                                                                                                                                                                                                                                                                                                                                                                                                                                                                                                                                                                                                                                                                                                                                                                                                                                                                                                                                                                                                                                                                                                                                                                                                                                                                                                                                                                                                                                                                                                                                                                                                   | NM_001002295 |
| GNA13  | I34T, G57S, S62F, M68K, Q134R, Y145F, L152F, E167D, Q169H, R264H, E273K, V322G, V362G, L371F                                                                                                                                                                                                                                                                                                                                                                                                                                                                                                                                                                                                                                                                                                                                                                                                                                                                                                                                                                                                                                                                                                                                                                                                                                                                                                                                                                                                                                                                                                                                                                                                                                              | NM_006572    |
| GNAS   | R201(844)S, R201(844)C, R201(844)H, R201(844)L, Q227(870)K, Q227(870)R, Q227(870)L, Q227(870)H, R374(1017)C                                                                                                                                                                                                                                                                                                                                                                                                                                                                                                                                                                                                                                                                                                                                                                                                                                                                                                                                                                                                                                                                                                                                                                                                                                                                                                                                                                                                                                                                                                                                                                                                                               | NM_016592    |
| GNB1   | K57N, K57M, K57E, K57T, I80T, I80N                                                                                                                                                                                                                                                                                                                                                                                                                                                                                                                                                                                                                                                                                                                                                                                                                                                                                                                                                                                                                                                                                                                                                                                                                                                                                                                                                                                                                                                                                                                                                                                                                                                                                                        | NM_002074    |
| IDH1   | R132C, R132G, R132H, R132L, R132P, R132V, V178I                                                                                                                                                                                                                                                                                                                                                                                                                                                                                                                                                                                                                                                                                                                                                                                                                                                                                                                                                                                                                                                                                                                                                                                                                                                                                                                                                                                                                                                                                                                                                                                                                                                                                           | NM_005896    |
| IDH2   | R140W, R140Q, R140L, R140G, R172W, R172G, R172K, R172T, R172M, R172N, R172S                                                                                                                                                                                                                                                                                                                                                                                                                                                                                                                                                                                                                                                                                                                                                                                                                                                                                                                                                                                                                                                                                                                                                                                                                                                                                                                                                                                                                                                                                                                                                                                                                                                               | NM_002168    |
| IKZF1  | Frameshift/nonsense                                                                                                                                                                                                                                                                                                                                                                                                                                                                                                                                                                                                                                                                                                                                                                                                                                                                                                                                                                                                                                                                                                                                                                                                                                                                                                                                                                                                                                                                                                                                                                                                                                                                                                                       | NM_006060    |
| IKZF2  | Frameshift/nonsense                                                                                                                                                                                                                                                                                                                                                                                                                                                                                                                                                                                                                                                                                                                                                                                                                                                                                                                                                                                                                                                                                                                                                                                                                                                                                                                                                                                                                                                                                                                                                                                                                                                                                                                       | NM_016260    |
| IKZF3  | Frameshift/nonsense                                                                                                                                                                                                                                                                                                                                                                                                                                                                                                                                                                                                                                                                                                                                                                                                                                                                                                                                                                                                                                                                                                                                                                                                                                                                                                                                                                                                                                                                                                                                                                                                                                                                                                                       | NM_012481    |
| JAK1   | T478A, T478S, V623A, A634D, L653F, R724H, R724Q, R724P, T782M, L783F                                                                                                                                                                                                                                                                                                                                                                                                                                                                                                                                                                                                                                                                                                                                                                                                                                                                                                                                                                                                                                                                                                                                                                                                                                                                                                                                                                                                                                                                                                                                                                                                                                                                      | NM_002227    |
| JAK2   | N533D, N533Y, N533S, H538R, K539E, K539L, I540T, I540V, V617F, R683S, R683G, del/ins537-539L, del/ins538-539L, del/ins540-543MK, del/ins540-544MK, del/ins541-543K, del542-543, del543-544, ins11546-547                                                                                                                                                                                                                                                                                                                                                                                                                                                                                                                                                                                                                                                                                                                                                                                                                                                                                                                                                                                                                                                                                                                                                                                                                                                                                                                                                                                                                                                                                                                                  | NM_004972    |
| JAK3   | M511T, M511I, A572V, A572T, A573V, R657Q, V715I, V715A                                                                                                                                                                                                                                                                                                                                                                                                                                                                                                                                                                                                                                                                                                                                                                                                                                                                                                                                                                                                                                                                                                                                                                                                                                                                                                                                                                                                                                                                                                                                                                                                                                                                                    | NM_000215    |

KDM6A Frameshift/nonsense/splice-site, del419NM\_021140  
 KIT ins503, V559A, V559D, V559G, V559I, V560D, V560A, V560G, V560E, del560, E561K, del579, P627L, P627T, R634W, K642E, K642Q, V654A, V654E, H697Y, H697D, E761D, K807R, D816H, D816Y, D816F, D816I, D816V, D816H, del551-559 NM\_000222  
 KRAS G12D, G12A, G12E, G12V, G13D, G13C, G13Y, G13F, G13R, G13A, G13V, G13E, V14I, T58I, G60D, G60A, G60V, Q61K, Q61E, Q61P, Q61R, Q61L, Q61H, K117E, K117N, A146T, A146P, A146V NM\_033360  
 LUC7L2 Frameshift/nonsense/splice-site NM\_016019  
 MLL Frameshift/nonsense NM\_005933  
 MLL2 Frameshift/nonsense NM\_003482  
 MPL S505G, S505N, S505C, L510P, del513, W515A, W515R, W515K, W515S, W515L, A519T, A519V, Y591D, W515-518KT NM\_005373  
 NF1 Frameshift/nonsense NM\_000267  
 NPM1 Frameshift p.W288fs (insertion at c.859\_860, 860\_861, 862\_863, 863\_864) NM\_002520  
 NRAS G12S, G12R, G12C, G12N, G12P, G12Y, G12D, G12A, G12V, G12E, G13S, G13R, G13C, G13N, G13P, G13Y, G13D, G13A, G13V, G13E, G60E, G60R, Q61R, Q61L, Q61K, Q61P, Q61H, Q61Q NM\_002524  
 PDS5B Frameshift/nonsense/splice-site, R1292Q NM\_015032  
 PDSS2 Frameshift/nonsense NM\_020381  
 PHF6 Frameshift/nonsense/splice-site, A40D, M125I, S246Y, F263L, R274Q, C297Y, H302Y, H329L NM\_001015877  
 PHIP Frameshift/nonsense/splice-site NM\_017934  
 PPM1D Frameshift/nonsense, exon 5 or 6 NM\_003620  
 PRPF40B Frameshift/nonsense/splice-site, P15H, M58I, P405L, P562S, NM\_001031698  
 PRPF8 M1307I, C1594W, D1598Y, D1598N, D1598V (ADD MORE VARS) NM\_006445  
 PTEN Frameshift/nonsense/splice-site, D24G, R47G, F56V, L57W, H61R, K66N, Y68H, C71Y, F81C, Y88C, D92G, D92V, D92E, H93Y, H93D, H93Q, N94I, P95L, I101T, C105F, C105S, D107Y, L112V, H123Y, C124R, C124S, K125E, A126D, K128N, R130G, R130Q, R130L, G132D, I135V, I135K, C136R, C136F, K144Q, A151T, D153Y, D153N, Y155H, Y155C, R159K, R159S, R161K, R161I, G165R, G165E, S170N, S170I, R173C, Y174D, Y177C, H196Y, R234W, G251C, D252Y, F271S, D326G NM\_000314  
 PTPN11 G60V, G60R, G60A, D61Y, D61V, D61G, Y63C, E69K, E69G, E69D, E69Q, F71L, F71K, A72T, A72V, A72D, T73I, E76K, E76Q, E76M, E76A, E76G, E139G, E139D, N308D, N308T, N339S, P491L, S502P, S502A, S502L, G503V, G503G, G503A, G503E, Q506P, T507A, T507KNM\_002834  
 RAD21 Frameshift/nonsense/splice-site, R65Q, H208R, Q474R NM\_006265  
 RUNX1 Frameshift/nonsense/splice-site, S73F, H78Q, H78L, R80C, R80P, R80H, L85Q, P86L, P86H, S114L, D133Y, L134P, R135G, R135K, R135S, R139Q, R142S, A165V, R174Q, R177L, R177Q, A224T, D171G, D171V, D171N, R205W, R223C NM\_001001890  
 SETBP1 D868N, D868T, S869N, G870S, I871T, D880N, D880Q NM\_015559  
 SETD2 Frameshift/nonsense, V1190M NM\_014159  
 SETDB1 Frameshift/nonsense, K715E NM\_001145415  
 SF1 Frameshift/nonsense/splice-site, T454M, Y476C, A508G NM\_004630  
 SF3A1 Frameshift/nonsense/splice-site, A57S, M117I, K166T, Y271C NM\_005877  
 SF3B1 G347V, R387W, R387Q, E592K, E622D, Y623C, R625L, R625C, R625G, H662Q, H662D, T663I, K666N, K666T, K666E, K666R, K700E, V701F, A708T, G740R, G740E, A744P, D781G, E783K, R831Q, L833F, E862K, R957Q NM\_012433  
 SFRS2 Y44H, P95H, P95L, P95T, P95R, P95A, P107H, P95fs NM\_003016  
 SMC1A K190T, R586W, M689V, R807H, R1090H, R1090C NM\_006306  
 SMC3 Frameshift/nonsense, R155I, Q367E, D392V, K571R, R661P, G662C NM\_005445  
 STAG1 Frameshift/nonsense/splice-site, H1085Y NM\_005862  
 STAG2 Frameshift/nonsense/splice-site NM\_006603  
 SUZ12 Frameshift/nonsense NM\_015355  
 TET2 Frameshift/nonsense/splice-site, missense mutations in catalytic domains (p.1104-1481 and 1843-2002) NM\_001127208  
 TP53 Frameshift/nonsense/splice-site, S46F, G105C, G105R, G105D, G108S, G108C, R110L, R110C, T118A, T118R, T118I, S127F, S127Y, L130V, L130F, K132Q, K132E, K132W, K132R, K132M, K132N, F134V, F134L, F134S, C135W, C135S, C135F, C135G, C135Y, Q136K, Q136E, Q136P, Q136R, Q136L, Q136H, A138P, A138V, A138A, A138T, T140I, C141R, C141G, C141A, C141Y, C141S, C141F, C141W, V143M, V143A, V143E, L145Q, W146C, W146L, L145R, V147G, P151T, P151A, P151S, P151H, P151R, P152S, P152R, P152L, T155P, T155A, V157F, R158H, R158L, A159V, A159P, A159S, A159D, A161T, A161D, Y163N, Y163H, Y163D, Y163S, Y163C, K164E, K164M, K164N, K164P, H168Y, H168P, H168R, H168L, H168Q, M169I, M169T, M169V, E171K, E171Y, E171Q, E171G, E171A, E171V, E171D, V172D, V172M, V173L, V173G, R174W, R175G, R175C, R175H, C176R, C176G, C176Y, C176F, C176S, P177R, P177L, H178D, H178P, H178Q, H179Y, H179R, H179Q, R181C, R181Y, D186G, G187S, P190L, P190T, H193N, H193P, H193L, H193R, L194F, L194R, I195F, I195N, I195T, R196P, V197L, G199V, Y205N, Y205C, Y205H, D208V, R213Q, R213P, R213L, R213Q, H214D, H214R, S215G, S215I, S215R, V216M, V217G, Y220N, Y220H, Y220S, Y220C, E224D, I232F, I232N, I232T, I232S, Y234N, Y234H, Y234S, Y234C, Y236N, Y236H, Y236C, M237V, M237K, M237I, C238R, C238G, C238Y, C238W, N239T, N239S, S241Y, S241C, S241F, C242G, C242Y, C242S, C242F, G244S, G244C, G244D, G245S, G245R, G245C, G245D, G245A, G245V, G245S, M246V, M246K, M246R, M246I, N247I, R248W, R248G, R248Q, R249G, R249W, R249T, R249M, P250L, I251N, L252P, I254S, I255F, I255N, I255S, L257Q, L257P, E258K, E258Q, D259Y, S261T, G262D, G262V, L265P, G266R, G266E, G266V, R267W, R267Q, R267P, E271K, V272M, V272L, R273S, R273G, R273C, R273H, R273P,

R273L, V274F, V274D, V274A, V274G, V274L, C275Y, C275S, C275F, A276P, C277F, C277Y, P278T, P278A, P278S, P278H, P278R, P278L, G279E, R280G, R280K, R280T, R280I, R280S, D281N, D281H, D281Y, D281G, D281E, R282G, R282W, R282Q, R282P, E285K, E285V, E286G, E286V, E286K, K320N, L330R, G334V, R337C, R337L, A347T, L348F, T377P NM\_001126112  
U2AF1 D14G, S34F, S34Y, R35L, R156H, R156Q, Q157R, Q157P NM\_006758  
U2AF2 R18W, Q143L, M144I, L187V, Q190L NM\_007279  
WT1 Frameshift/nonsense/splice-site NM\_024426  
ZRSR2 Frameshift/nonsense, R126P, E133G, C181F, H191Y, I202N, F239V, F239Y, N261Y, C280R, C302R, C326R, H330R, N382K NM\_005089

Table S4. The multivariable logistic regression models testing a potential effect of the coverage in the matched sub cohorts. Models were run using the glm function with the setting "family="binomial" in R.

| <b>model</b>                                                                                                                                                                                                                  | <b>trait</b>        | <b>coefficient</b> | <b>p-value</b>    |
|-------------------------------------------------------------------------------------------------------------------------------------------------------------------------------------------------------------------------------|---------------------|--------------------|-------------------|
| <b>1: CHIP carrier (0/1) ~ cohort (0/1)</b>                                                                                                                                                                                   | <b>intercept</b>    | <b>-3.5492</b>     | <b>&lt; 2e-16</b> |
|                                                                                                                                                                                                                               | <b>cohort (0/1)</b> | <b>0.9342</b>      | <b>0.00452</b>    |
| 2: CHIP carrier (0/1) ~ cohort (0/1) + Total Coverage (DNMT3A + TET2 + JAK2 + ASXL1)<br><br>After removing the 'total coverage' the model converged to the model 1                                                            | intercept           | -0.731221          | 7.74e-15          |
|                                                                                                                                                                                                                               | cohort (0/1)        | 0.731221           | 0.0622            |
|                                                                                                                                                                                                                               | total coverage      | 0.002350           | 0.3188            |
| 3: CHIP carrier (0/1) ~ cohort (0/1) + coverage of DNMT3A + coverage of TET2 + coverage of JAK2 + coverage of ASXL1<br><br>After step by step removing of the least significant variables, the model converged to the model 1 | intercept           | -4.066032          | 4.48e-14          |
|                                                                                                                                                                                                                               | cohort (0/1)        | 0.733876           | 0.0866            |
|                                                                                                                                                                                                                               | coverage of DNMT3A  | -0.007368          | 0.6921            |
|                                                                                                                                                                                                                               | coverage of TET2    | -0.011276          | 0.4340            |
|                                                                                                                                                                                                                               | coverage of JAK2    | 0.004443           | 0.7310            |
|                                                                                                                                                                                                                               | coverage of ASXL1   | 0.025918           | 0.3376            |
